# Supplementary material for: Dataset of urinary metabolites measured by 1H NMR analysis of normal human urine
Source: PubMed Central journal article supplement (PMC5155042; doi:10.1016/j.dib.2016.11.101), 2016-12-07
Supplement: mmc1.pdf [file mmc1.pdf]

# Conflicts of Interest Statement

---

Manuscript title: Dataset of urinary metabolites measured by 1H NMR analysis of normal human urine

---

---

The authors whose names are listed immediately below certify that they have NO affiliations with or involvement in any organization or entity with any financial interest (such as honoraria; educational grants; participation in speakers' bureaus; membership, employment, consultancies, stock ownership, or other equity interest; and expert testimony or patent-licensing arrangements), or non-financial interest (such as personal or professional relationships, affiliations, knowledge or beliefs) in the subject matter or materials discussed in this manuscript.

**Author names:**

Marc Cassiede, Sindhu Nair, Meghan Dueck, James Mino, Ryan McKay, Pascal Mercier, Bernadette Quemerais, Paige Lacy

The authors whose names are listed immediately below report the following details of affiliation or involvement in an organization or entity with a financial or non-financial interest in the subject matter or materials discussed in this manuscript. Please specify the nature of the conflict on a separate sheet of paper if the space below is inadequate.

**Author names:**

This statement is signed by all the authors to indicate agreement that the above information is true and correct (a photocopy of this form may be used if there are more than 10 authors):

Author's name (typed)

Author's signature

Date

Paige Lacy

*Paige Lacy*

November 24, 2016

Marc Cassiede

*M Cassiede*

November 24, 2016

Sindhu Nair

*S. Paige Lacy for SN*

November 24, 2016

Meghan Dueck

*Meghan Dueck*

Nov. 24 2016

James Mino

\_\_\_\_\_

\_\_\_\_\_

Ryan McKay

\_\_\_\_\_

\_\_\_\_\_

Pascal Mercier

\_\_\_\_\_

\_\_\_\_\_

Bernadette Quemerai

*Bernadette Quemerai*

November 24, 2016

\_\_\_\_\_

\_\_\_\_\_

\_\_\_\_\_

\_\_\_\_\_

\_\_\_\_\_

\_\_\_\_\_

This statement is signed by all the authors to indicate agreement that the above information is true and correct (a photocopy of this form may be used if there are more than 10 authors):

Author's name (typed)

Author's signature

Date

Paige Lacy

November 24, 2016

Marc Cassiede

Sindhu Nair

Meghan Dueck

James Mino



Nov, 24, 2016

Ryan McKay

Pascal Mercier

Bernadette Quemerais

This statement is signed by all the authors to indicate agreement that the above information is true and correct (a photocopy of this form may be used if there are more than 10 authors):

| Author's name (typed) | Author's signature                                                                   | Date              |
|-----------------------|--------------------------------------------------------------------------------------|-------------------|
| Paige Lacy            |                                                                                      | November 24, 2016 |
| Marc Cassiede         |                                                                                      |                   |
| Sindhu Nair           |                                                                                      |                   |
| Meghan Dueck          |                                                                                      |                   |
| James Mino            |                                                                                      |                   |
| Ryan McKay            | 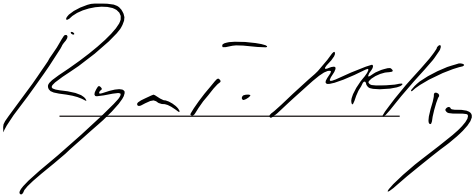 | Nov. 24, 2016     |
| Pascal Mercier        |                                                                                      |                   |
| Bernadette Quemerai   |                                                                                      |                   |
|                       |                                                                                      |                   |
|                       |                                                                                      |                   |

This statement is signed by all the authors to indicate agreement that the above information is true and correct (a photocopy of this form may be used if there are more than 10 authors):

Author's name (typed)

Author's signature

Date

Paige Lacy

November 24, 2016

Marc Cassiede

Sindhu Nair

Meghan Dueck

James Mino

Ryan McKay

Pascal Mercier



Bernadette Quemerais
